# Supplementary material
Source: PubMed Central journal article supplement (PMC1193866)
Supplement: JCI0523126sd.pdf [file JCI0523126sd.pdf]

# Supplementary Table 1: Potente et al.

| Genbank   | Common                             | FoxO1:<br>siRNA/scrambled | Daly et al.<br>FoxO1 A3 / GFP |
|-----------|------------------------------------|---------------------------|-------------------------------|
| D13891    | ID2                                | 0.35                      | 13.48                         |
| AF187858  | Angiopoietin 2                     | 0.37                      | 14.33                         |
| AF132818  | Kruppel-like factor 5 (KLF5)       | 0.49                      | 14.2                          |
| NM_001168 | Survivin                           | 1.8                       | 0.19                          |
| NM_002345 | Lumican                            | 0.36                      | 26.83                         |
| NM_002019 | Fms-related tyrosine kinase 1      | 0.59                      | 11.3                          |
| NM_004428 | Ephrin-A1                          | 1.35                      | 0.19                          |
| AF138303  | Decorin                            | 0.64                      | 100                           |
| AI813758  | Pro-alpha-1 type 3 collagen        | 0.75                      | 12.79                         |
| AF020761  | Ubiquitin-conjugating enzyme E2D 1 | 0.53                      | 9.28                          |
| NM_004447 | EPS8                               | 0.78                      | 4.76                          |
| AB011446  | Serine/threonine kinase 12         | 1.47                      | 0.18                          |
| NM_000362 | TIMP 3                             | 0.83                      | 6.35                          |
| NM_006329 | Fibulin 5                          | 1.37                      | 11.15                         |
| NM_007317 | Kinesin-like 4                     | 1.35                      | 0.19                          |
| AL096710  | Bullous pemphigoid antigen 1       | 0.65                      | 11.97                         |
| NM_001706 | BCL-6                              | 0.92                      | 6.41                          |
| NM_005045 | Reelin                             | 0.83                      | 15.07                         |
| NM_000216 | Kallmann syndrome 1                | 0.75                      | 54.27                         |
| NM_001809 | Centromere protein A               | 1.64                      | 0.17                          |
| AF055585  | SLIT-2                             | 0.79                      | 5.77                          |
| NM_005733 | RAB6KIFL                           | 1.35                      | 0.15                          |
| NM_001255 | CDC20                              | 1.26                      | 0.14                          |
| NM_024501 | HOXD1                              | 0.80                      | 4.92                          |
| D55716    | MCM2                               | 1.20                      | 0.17                          |
| U40372    | Phosphodiesterase 1C               | 0.89                      | 16.11                         |
| NM_002423 | MMP-7                              | 0.87                      | 100                           |
| NM_003810 | Trail                              | 1.02                      | 2.76                          |
| AI962897  | SEMA3C                             | 0.96                      | 86.63                         |
| NM_006080 | SEMA3A                             | 0.74                      | 10.52                         |
| M73554    | Cyclin D1                          | 0.73                      | 0.31                          |
| M96789    | Connexin 37                        | 0.89                      | 0.09                          |
| NM_005266 | Connexin 40                        | 0.87                      | 0.1                           |
| NM_003914 | Cyclin A1                          | 1.01                      | 0.2                           |
| NM_005524 | Hairy (Drosophila)-homolog (HES-1) | 0.94                      | 0.09                          |

**Supplementary Table 1:** Comparison of gene expression changes in FoxO1 A3-transduced endothelial cells described by Daly et al. (Genes Dev. 2004 May 1;18(9):1060-71) with the respective genes in FoxO1 siRNA-transfected endothelial cells.

# Supplementary Fig.1 : Potente et al.

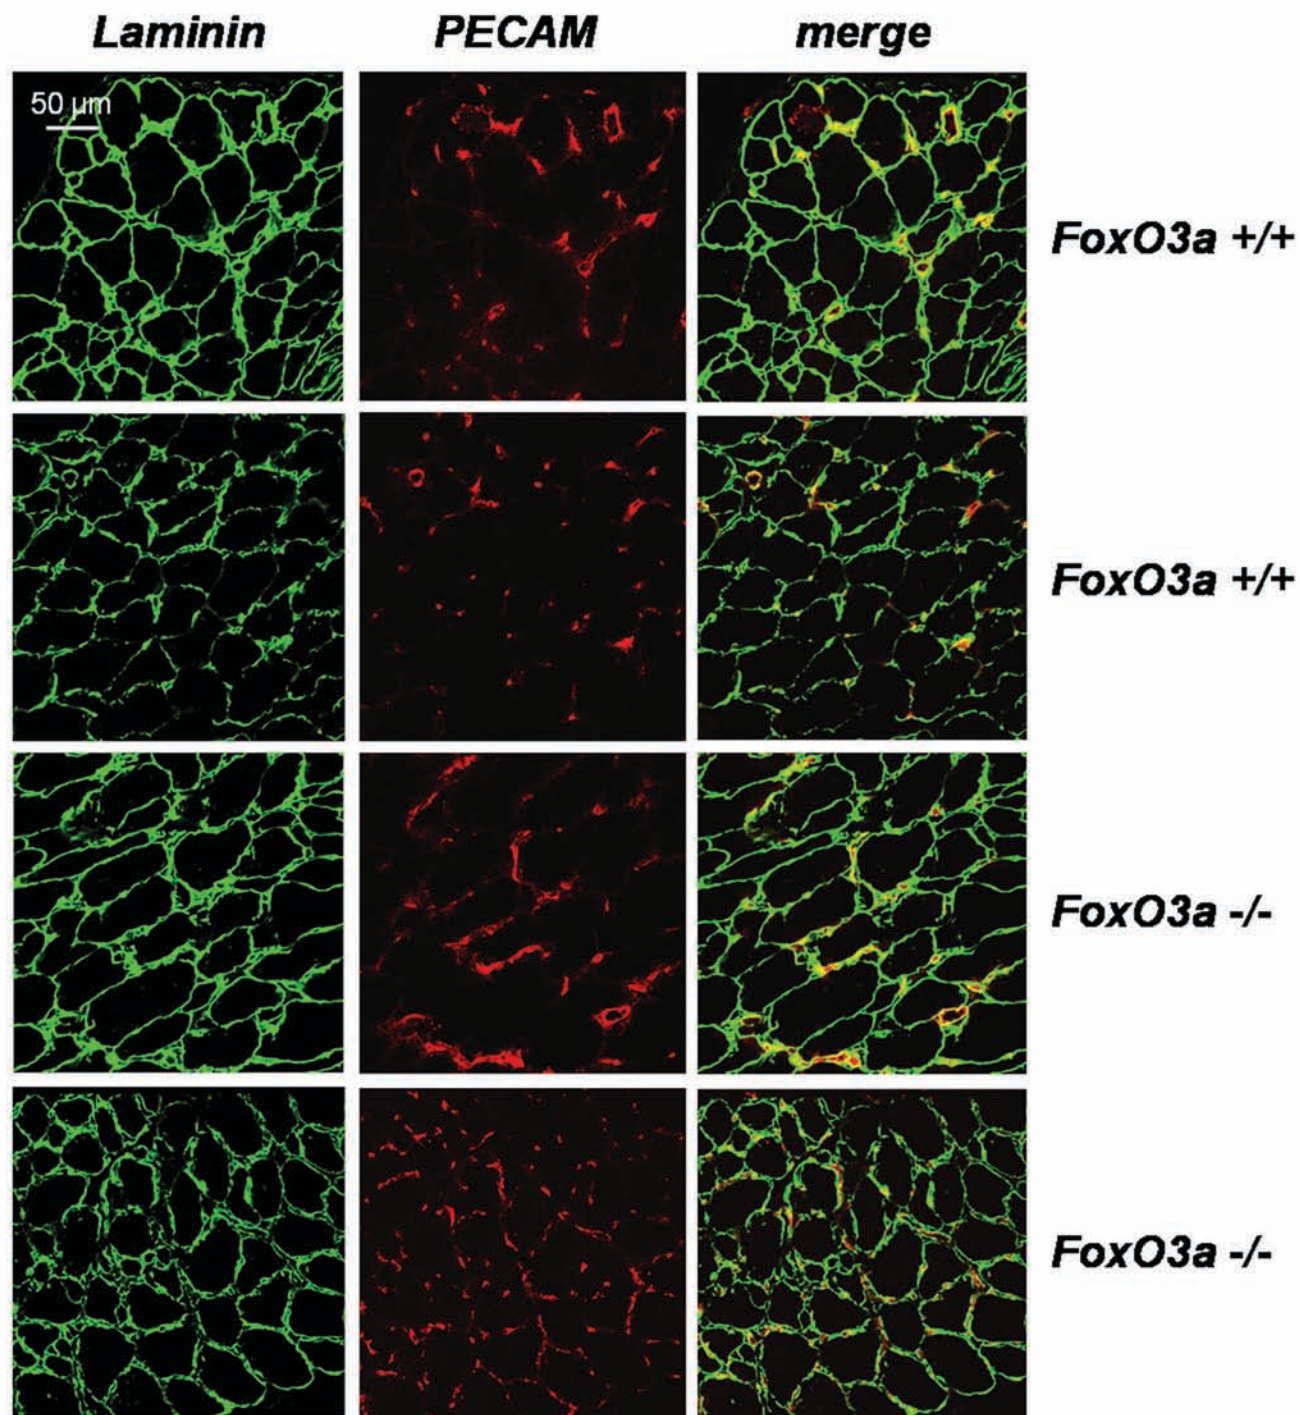

**Supplementary Fig.1** : Capillary density was determined in 8- $\mu$ m frozen sections of the adductor and semimembraneous muscles. Endothelial cells were stained for CD31 (PE-labeled; BD Biosciences). Myocyte Membranes were stained using an antibody to laminin (rabbit) followed by anti-rabbit-Alexa 488.
